# Supplementary material for: Self-assembly of tetranuclear {[Co(trien)]2[W(CN)8]2}2– or {[Co(tren)]2[W(CN)8]2}2– squares with alternating aliphatic tetramine Co(iii) and octacyanotungstate(iv) cornersElectronic supplementary information (ESI) available: the distances (Å) and angles (°) of possible hydrogen bonds for K2{[CoIII(tren)]2[WIV(CN)8]2}·9H2O (2); rate constants and activation parameters for the reaction of cis-α-[Cr(trien)Cl(OH2)]2+ with [W(CN)8]4– in aqueous solution. See http://www.rsc.org/suppdata/dt/b2/b210669h/
Source: Royal Society of Chemistry journal article supplement (doi:10.1039/b210669h), 2003-02-03
Supplement: s1b210669h.pdf [file s1b210669h.pdf]

## Supplementary Data

### Self-assembly of tetranuclear $\{[\text{Co}(\text{trien})]_2[\text{W}(\text{CN})_8]_2\}^{2-}$ or $\{[\text{Co}(\text{trien})]_2[\text{W}(\text{CN})_8]_2\}^{2-}$ square of alternating aliphatic tetramine Co(III) and octacyanotungstate(IV) corners

Rafał Kania, Krzysztof Lewiński and Barbara Sieklucka\*

*Faculty of Chemistry, Jagiellonian University, Ingardena 3, 30-060 Krakow, Poland. E-mail: siekluck@chemia.uj.edu.pl.*

Table S1. The distances [Å] and angles [°] of possible hydrogen bonds for  $\text{K}_2\{[\text{Co}^{\text{III}}(\text{tren})]_2[\text{W}^{\text{IV}}(\text{CN})_8]_2\}\cdot 9\text{H}_2\text{O}$  (**2**).

| D–H      | d(D–H) | d(H..A) | <DHA   | d(D..A) | A   |
|----------|--------|---------|--------|---------|-----|
| N31–H311 | 0.900  | 2.202   | 144.24 | 2.979   | N12 |
| N31–H312 | 0.900  | 2.108   | 162.47 | 2.979   | N14 |
| N34–H341 | 0.900  | 2.105   | 161.50 | 2.973   | O5  |
| N34–H342 | 0.900  | 2.300   | 163.33 | 3.172   | N12 |
| N37–H371 | 0.900  | 2.255   | 151.40 | 3.076   | N14 |
| N37–H372 | 0.900  | 2.339   | 147.06 | 3.133   | O12 |
| N41–H411 | 0.900  | 2.200   | 146.67 | 2.993   | N23 |
| N41–H412 | 0.900  | 2.023   | 165.63 | 2.903   | N24 |
| N44–H441 | 0.900  | 2.096   | 151.70 | 2.920   | O7  |
| N44–H442 | 0.900  | 2.196   | 165.03 | 3.074   | N23 |
| N47–H471 | 0.900  | 2.235   | 149.13 | 3.042   | N24 |
| N47–H472 | 0.900  | 2.104   | 161.47 | 2.971   | O6  |
| O1       | –      | –       | –      | 2.888   | N13 |
| O2       | –      | –       | –      | 2.802   | N27 |
| O4       | –      | –       | –      | 2.791   | N25 |
| O5       | –      | –       | –      | 2.768   | O11 |
| O5       | –      | –       | –      | 3.018   | N23 |
| O6       | –      | –       | –      | 2.724   | O12 |
| O6       | –      | –       | –      | 2.958   | N14 |
| O11      | –      | –       | –      | 2.860   | O12 |
| O11      | –      | –       | –      | 3.050   | N16 |
