# Supplementary material for: Self-assembly of tetranuclear {[Co(trien)]2[W(CN)8]2}2– or {[Co(tren)]2[W(CN)8]2}2– squares with alternating aliphatic tetramine Co(iii) and octacyanotungstate(iv) cornersElectronic supplementary information (ESI) available: the distances (Å) and angles (°) of possible hydrogen bonds for K2{[CoIII(tren)]2[WIV(CN)8]2}·9H2O (2); rate constants and activation parameters for the reaction of cis-α-[Cr(trien)Cl(OH2)]2+ with [W(CN)8]4– in aqueous solution. See http://www.rsc.org/suppdata/dt/b2/b210669h/
Source: Royal Society of Chemistry journal article supplement (doi:10.1039/b210669h), 2003-02-03
Supplement: s2b210669h.pdf [file s2b210669h.pdf]

## Supplementary Data

**Self-assembly of tetranuclear  $\{[\text{Co}(\text{trien})]_2[\text{W}(\text{CN})_8]_2\}^{2-}$  or  $\{[\text{Co}(\text{trien})]_2[\text{W}(\text{CN})_8]_2\}^{2-}$  square of alternating aliphatic tetramine Co(III) and octacyanotungstate(IV) corners**

Rafał Kania, Krzysztof Lewiński and Barbara Sieklucka\*

*Faculty of Chemistry, Jagiellonian University, Ingardena 3, 30-060 Krakow, Poland. E-mail: siekluck@chemia.uj.edu.pl.*

Table S2 follows.

Table S2. Rate constants and activation parameters for the reaction of *cis*- $\alpha$ -[Cr(trien)Cl(OH<sub>2</sub>)]<sup>2+</sup> with [W(CN)<sub>8</sub>]<sup>4-</sup> in aqueous solution \*.

| T                                                          | [W(CN) <sub>8</sub> ] <sup>4-</sup>                | k <sub>obs</sub> <sup>I</sup>                       | k <sub>obs</sub> <sup>II</sup>  | k <sub>a</sub>                                                       | k <sub>b</sub>                                         | k <sub>b</sub>                  |
|------------------------------------------------------------|----------------------------------------------------|-----------------------------------------------------|---------------------------------|----------------------------------------------------------------------|--------------------------------------------------------|---------------------------------|
| °C                                                         | 10 <sup>2</sup> dm <sup>3</sup> ·mol <sup>-1</sup> | dm <sup>3</sup> ·mol <sup>-1</sup> ·s <sup>-1</sup> | 10 <sup>3</sup> s <sup>-1</sup> | 10 <sup>-2</sup> dm <sup>6</sup> ·mol <sup>-2</sup> ·s <sup>-1</sup> | 10 dm <sup>3</sup> ·mol <sup>-1</sup> ·s <sup>-1</sup> | 10 <sup>3</sup> s <sup>-1</sup> |
| 10                                                         | 0.8                                                | 1.3 ± 0.3                                           | 0.39 ± 0.02                     | 1.56 ± 0.02                                                          | 0.20 ± 0.01                                            | 0.15 ± 0.02                     |
|                                                            | 0.9                                                | 1.5 ± 0.1                                           | 0.41 ± 0.03                     |                                                                      |                                                        |                                 |
|                                                            | 1.0                                                | 1.6 ± 0.1                                           | 0.46 ± 0.02                     |                                                                      |                                                        |                                 |
|                                                            | 1.1                                                | 1.8 ± 0.2                                           | 0.47 ± 0.02                     |                                                                      |                                                        |                                 |
|                                                            | 1.2                                                | 1.9 ± 0.2                                           | 0.54 ± 0.02                     |                                                                      |                                                        |                                 |
|                                                            | 1.3                                                | 2.0 ± 0.3                                           | 0.56 ± 0.03                     |                                                                      |                                                        |                                 |
|                                                            | 1.4                                                | –                                                   | 0.58 ± 0.07                     |                                                                      |                                                        |                                 |
|                                                            | 1.5                                                | –                                                   | 0.60 ± 0.03                     |                                                                      |                                                        |                                 |
| 15                                                         | 0.8                                                | 1.9 ± 0.15                                          | 0.63 ± 0.02                     | 2.47 ± 0.02                                                          | 0.44 ± 0.02                                            | 0.28 ± 0.02                     |
|                                                            | 0.9                                                | 2.1 ± 0.1                                           | 0.68 ± 0.03                     |                                                                      |                                                        |                                 |
|                                                            | 1.0                                                | 2.4 ± 0.1                                           | 0.71 ± 0.02                     |                                                                      |                                                        |                                 |
|                                                            | 1.1                                                | 2.8 ± 0.5                                           | 0.76 ± 0.05                     |                                                                      |                                                        |                                 |
|                                                            | 1.2                                                | 3.0 ± 0.6                                           | 0.83 ± 0.02                     |                                                                      |                                                        |                                 |
|                                                            | 1.3                                                | 3.3 ± 1.0                                           | 0.86 ± 0.04                     |                                                                      |                                                        |                                 |
|                                                            | 1.4                                                | –                                                   | 0.91 ± 0.01                     |                                                                      |                                                        |                                 |
|                                                            | 1.5                                                | –                                                   | 0.94 ± 0.02                     |                                                                      |                                                        |                                 |
| 20                                                         | 0.8                                                | 2.4 ± 0.1                                           | 1.2 ± 0.05                      | 3.58 ± 8.7                                                           | 0.98 ± 0.03                                            | 0.40 ± 0.04                     |
|                                                            | 0.9                                                | 3.4 ± 0.2                                           | 1.3 ± 0.05                      |                                                                      |                                                        |                                 |
|                                                            | 1.0                                                | 3.8 ± 0.1                                           | 1.4 ± 0.1                       |                                                                      |                                                        |                                 |
|                                                            | 1.1                                                | 3.8 ± 0.6                                           | 1.5 ± 0.2                       |                                                                      |                                                        |                                 |
|                                                            | 1.2                                                | 4.2 ± 0.8                                           | 1.6 ± 0.2                       |                                                                      |                                                        |                                 |
|                                                            | 1.3                                                | 4.6 ± 1.4                                           | 1.7 ± 0.2                       |                                                                      |                                                        |                                 |
|                                                            | 1.4                                                | –                                                   | 1.8 ± 0.1                       |                                                                      |                                                        |                                 |
|                                                            | 1.5                                                | –                                                   | 1.9 ± 0.4                       |                                                                      |                                                        |                                 |
| 25                                                         | 0.8                                                | 3.8 ± 0.5                                           | 2.4 ± 0.08                      | 4.89 ± 0.06                                                          | 2.14 ± 0.05                                            | 0.66 ± 0.07                     |
|                                                            | 0.9                                                | 4.7 ± 0.1                                           | 2.5 ± 0.05                      |                                                                      |                                                        |                                 |
|                                                            | 1.0                                                | 5.0 ± 0.2                                           | 2.7 ± 0.05                      |                                                                      |                                                        |                                 |
|                                                            | 1.1                                                | 5.3 ± 0.3                                           | 3.0 ± 0.06                      |                                                                      |                                                        |                                 |
|                                                            | 1.2                                                | 5.8 ± 1.3                                           | 3.3 ± 0.1                       |                                                                      |                                                        |                                 |
|                                                            | 1.3                                                | 6.3 ± 1.0                                           | 3.4 ± 0.06                      |                                                                      |                                                        |                                 |
|                                                            | 1.4                                                | –                                                   | 3.6 ± 0.05                      |                                                                      |                                                        |                                 |
|                                                            | 1.5                                                | –                                                   | 3.8 ± 0.3                       |                                                                      |                                                        |                                 |
| 30                                                         | 0.8                                                | 4.3 ± 0.2                                           | 6.6 ± 0.4                       | 6.11 ± 0.07                                                          | 6.77 ± 0.16                                            | 1.18 ± 0.2                      |
|                                                            | 0.9                                                | 5.7 ± 0.2                                           | 7.2 ± 0.2                       |                                                                      |                                                        |                                 |
|                                                            | 1.0                                                | 6.1 ± 0.2                                           | 7.9 ± 0.1                       |                                                                      |                                                        |                                 |
|                                                            | 1.1                                                | 6.7 ± 0.6                                           | 8.6 ± 0.1                       |                                                                      |                                                        |                                 |
|                                                            | 1.2                                                | 7.2 ± 1.7                                           | 9.3 ± 0.5                       |                                                                      |                                                        |                                 |
|                                                            | 1.3                                                | 8.0 ± 2.3                                           | 10.0 ± 0.7                      |                                                                      |                                                        |                                 |
|                                                            | 1.4                                                | –                                                   | 10.7 ± 0.7                      |                                                                      |                                                        |                                 |
|                                                            | 1.5                                                | –                                                   | 11.3 ± 1.0                      |                                                                      |                                                        |                                 |
| $\Delta H^\ddagger$ (kJ mol <sup>-1</sup> )                |                                                    |                                                     |                                 | 46 ± 3                                                               | 121 ± 7                                                | 68 ± 3                          |
| $\Delta S^\ddagger$ (J K <sup>-1</sup> mol <sup>-1</sup> ) |                                                    |                                                     |                                 | -38 ± 11                                                             | +149 ± 23                                              | -77 ± 12                        |

\* I = 0.5 mol·dm<sup>-3</sup> (KCl); pH= 2;  $\lambda$ =550nm,
